# Supplementary material for: Profiling of Plant Growth-Promoting Metabolites by Phosphate-Solubilizing Bacteria in Maize Rhizosphere
Source: MDPI journal article supplement (doi:10.3390/plants10061071), 2021-05-27
Supplement: s1 [file s1]

Table S1. Results of Gram's test.

| Strains | Results of Gram's test |
|---------|------------------------|
| M16     | Gram negative          |
| M44     | Gram positive          |
