# Supplementary material for: Profiling of Plant Growth-Promoting Metabolites by Phosphate-Solubilizing Bacteria in Maize Rhizosphere
Source: MDPI journal article supplement (doi:10.3390/plants10061071), 2021-05-27
Supplement: s1 [file s1]

Table S3. Results of enzyme activities of M44.

| Enzymes/Substrates                 | Results |
|------------------------------------|---------|
| Water (Control)                    | -       |
| Alkaline phosphatase               | +       |
| Esterase (C4)                      | +       |
| Esterase Lipase (C8)               | +       |
| Lipase (C14)                       | -       |
| Leucine arylamidase                | -       |
| Valine arylamidase                 | -       |
| Cystine arylamidase                | -       |
| Trypsin                            | W       |
| $\alpha$ -Chymotrypsin             | -       |
| Acid phosphatase                   | +       |
| Naphthol-AS-BI-phosphohydrolase    | +       |
| $\alpha$ -Galactosidase            | -       |
| $\beta$ -Galactosidase             | -       |
| $\beta$ -Glucuronidase             | -       |
| $\alpha$ -Glucosidase              | -       |
| $\beta$ -Glucosidase               | +       |
| N-acetyl- $\beta$ -glucosaminidase | -       |
| $\alpha$ -Mannosidase              | -       |
| $\alpha$ -Fucosidase               | -       |

“+” means positive reaction, “-” means negative reaction, “W” means weakly positive reaction.
