# Supplementary material for: Profiling of Plant Growth-Promoting Metabolites by Phosphate-Solubilizing Bacteria in Maize Rhizosphere
Source: MDPI journal article supplement (doi:10.3390/plants10061071), 2021-05-27
Supplement: s1 [file s1]

Table S7. The correlation between differential metabolites and plant growth using Mantel Test.

| Metabolites                     | Statistic R | P-value |
|---------------------------------|-------------|---------|
| N-Acetyl-L-Methionine           | 0.7352      | 0.001   |
| Phenylacetaldehyde              | 0.7284      | 0.002   |
| Proline-hydroxyproline          | 0.6684      | 0.001   |
| N-Acetyl-D-Alloisoleucine       | 0.6571      | 0.001   |
| $\gamma$ -Glutamyl cysteine     | 0.6371      | 0.002   |
| DL- $\alpha$ -Tyrosine          | 0.6317      | 0.001   |
| Threonine-Leucine               | 0.6209      | 0.001   |
| Vanillic acid                   | 0.6181      | 0.005   |
| $\gamma$ -Glutamic acid-Leucine | 0.6114      | 0.001   |
| L-Kynurenine                    | 0.5975      | 0.004   |
| D-Phenylalanine                 | 0.5961      | 0.006   |
| ( $\pm$ )9-HpODE                | 0.5951      | 0.001   |
| Spermine                        | 0.5917      | 0.002   |
| L-Tyrosine                      | 0.572       | 0.003   |
| DL- $\beta$ -Leucine            | 0.5384      | 0.002   |
| Boc- $\beta$ -cyano-L-Alanine   | 0.5268      | 0.003   |
| L-Phenylalanine                 | 0.5049      | 0.004   |
| N-acetyl-L-Ornithine            | 0.4962      | 0.003   |
| DL-Norvaline                    | 0.4952      | 0.002   |
| L-(-)-Methionine                | 0.494       | 0.002   |
| 5-Hydroxytryptophan             | 0.4916      | 0.009   |
| Valine-Serine                   | 0.4806      | 0.006   |
| Indole                          | 0.4737      | 0.004   |
| Pyridoxine                      | 0.4735      | 0.001   |
| Phenylacetyl glycine            | 0.451       | 0.007   |
| L-Lysine                        | 0.4494      | 0.005   |
| Prolyl leucine                  | 0.4375      | 0.001   |
| L-Histidinol                    | 0.4278      | 0.002   |
| DL-Lysine                       | 0.4205      | 0.002   |
| 5-Hydroxylysine                 | 0.42        | 0.022   |
| 2-(2-chlorophenyl)-1H-Indole    | 0.4155      | 0.003   |
| Cadaverine                      | 0.4082      | 0.002   |
| $\alpha$ -Linolenic acid        | 0.353       | 0.008   |
| Pyridoxamine                    | 0.3444      | 0.015   |
| Glycerol 3-phosphate            | 0.333       | 0.004   |
| N-Acetyl-DL-Tryptophan          | 0.3215      | 0.034   |
| L-Methionine sulfone            | 0.3172      | 0.03    |
| Proline                         | 0.3099      | 0.029   |
| L-Alanyl-L-Proline              | 0.304       | 0.045   |
| DL-Serine                       | 0.2964      | 0.026   |
| L-5-Hydroxytryptophan           | 0.2963      | 0.04    |
| Phenylalanine-Phenylalanine     | 0.2874      | 0.011   |

|                          |        |       |
|--------------------------|--------|-------|
| Coumarin                 | 0.2819 | 0.019 |
| L-Homocitrulline         | 0.2641 | 0.021 |
| Choline Glycerophosphate | 0.2596 | 0.041 |
| 5-oxoproline             | 0.2505 | 0.013 |
| N-Oleoyl Dopamine        | 0.2415 | 0.013 |
| D-(+)-Proline            | 0.2169 | 0.036 |

Only the metabolites with  $P$ -value  $< 0.05$  were exhibited in this table.
