# Supplementary material for: Profiling of Plant Growth-Promoting Metabolites by Phosphate-Solubilizing Bacteria in Maize Rhizosphere
Source: MDPI journal article supplement (doi:10.3390/plants10061071), 2021-05-27
Supplement: s1 [file s1]

Table S5. Utilization of carbon sources to produce acids by M44.

| Carbon sources                     | Results | Carbon sources  | Results |
|------------------------------------|---------|-----------------|---------|
| Control                            | -       | Esculin         | +       |
| Glycerol                           | +       | Salicin         | +       |
| Erythritol                         | -       | Cellobiose      | +       |
| D-arabinose                        | -       | Maltose         | +       |
| L-arabinose                        | +       | Lactose         | +       |
| D-ribose                           | +       | Melibiose       | +       |
| D-xylose                           | +       | Sucrose         | +       |
| L-xylose                           | -       | Trehalose       | +       |
| D-adonitol                         | -       | Inulin          | -       |
| Methyl- $\beta$ -D-xylopyranoside  | -       | Melezitose      | -       |
| D-galactose                        | +       | Raffinose       | +       |
| D-glucose                          | +       | Starch          | -       |
| D-fructose                         | +       | Glycogen        | -       |
| D-mannose                          | +       | Xylitol         | -       |
| L-sorbose                          | -       | Gentiobiose     | +       |
| L-rhamnose                         | -       | Turanose        | +       |
| Dulcitol                           | -       | D-lyxose        | -       |
| Inositol                           | +       | D-tagatose      | -       |
| D-mannitol                         | +       | D-fucose        | -       |
| D-sorbitol                         | -       | L-fucose        | -       |
| Methyl $\alpha$ -D-mannopyranoside | -       | D-arabitol      | -       |
| Methyl $\alpha$ -D-glucopyranoside | +       | L-arabitol      | -       |
| N-acetyl-glucosamine               | W       | Gluconate       | -       |
| Amygdalin                          | +       | 2-Ketogluconate | -       |
| Arbutin                            | +       | 5-Ketogluconate | -       |

“+” means positive reaction, “-” means negative reaction, “W” means weakly positive reaction.
