# Supplementary material for: Profiling of Plant Growth-Promoting Metabolites by Phosphate-Solubilizing Bacteria in Maize Rhizosphere
Source: MDPI journal article supplement (doi:10.3390/plants10061071), 2021-05-27
Supplement: s1 [file s1]

Table S2. Results of enzyme activities of M16.

| Enzymes/Substrates                    | Results |
|---------------------------------------|---------|
| $\beta$ -Galactosidase                | +       |
| Arginine dihydrolase                  | +       |
| Lysine decarboxylase                  | -       |
| Ornithine decarboxylase               | +       |
| Citrate utilization                   | -       |
| H <sub>2</sub> S production           | -       |
| Urease/Urea hydrolysis                | -       |
| Tryptophan deaminase                  | -       |
| Indole production                     | +       |
| Acetoin production                    | +       |
| Gelatinase/Gelatin hydrolysis         | -       |
| Fermentation/Oxidation of D-glucose   | +       |
| Fermentation/Oxidation of D-mannitol  | +       |
| Fermentation/Oxidation of inositol    | -       |
| Fermentation/Oxidation of sorbitol    | +       |
| Fermentation/Oxidation of L-rhamnose  | +       |
| Fermentation/Oxidation of sucrose     | -       |
| Fermentation/Oxidation of melibiose   | -       |
| Fermentation/Oxidation of amygdalin   | +       |
| Fermentation/Oxidation of L-arabinose | +       |

“+” means positive reaction, “-” means negative reaction.
